# Supplementary figures and images for: Small molecule cognitive enhancer reverses age-related memory decline in mice
Source: eLife journal article supplement (doi:10.7554/elife.62048), 2020-11-30

Figure 3 - Supplemental Figure 2

A

↑ = excitatory synaptic current

Young

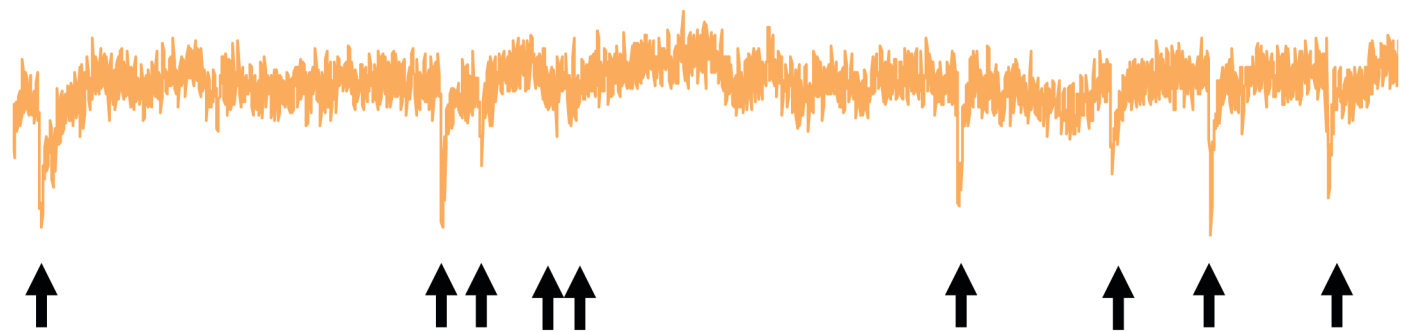

Old

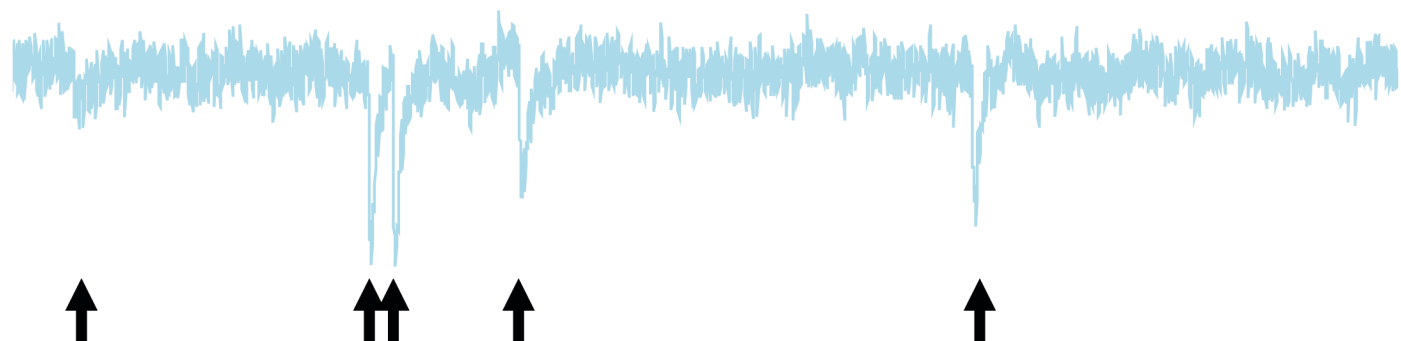

Old + ISRIB

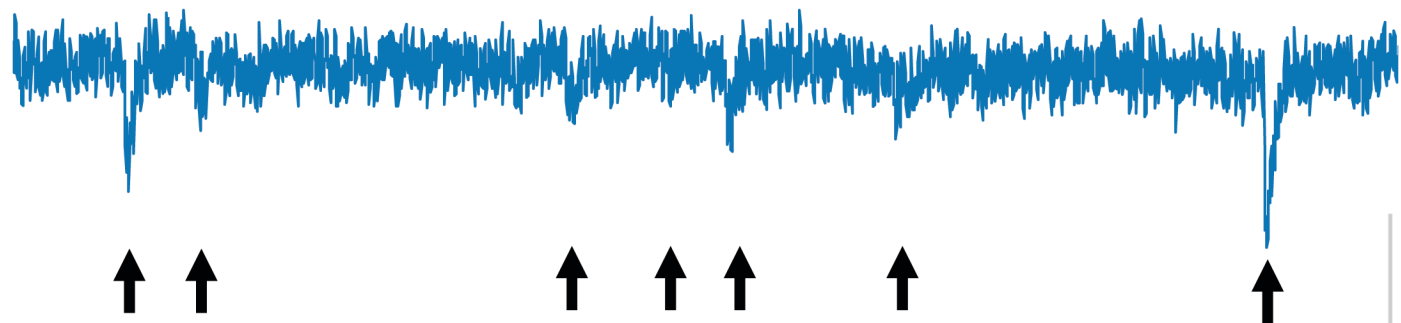

20 pA

0.4 s

B

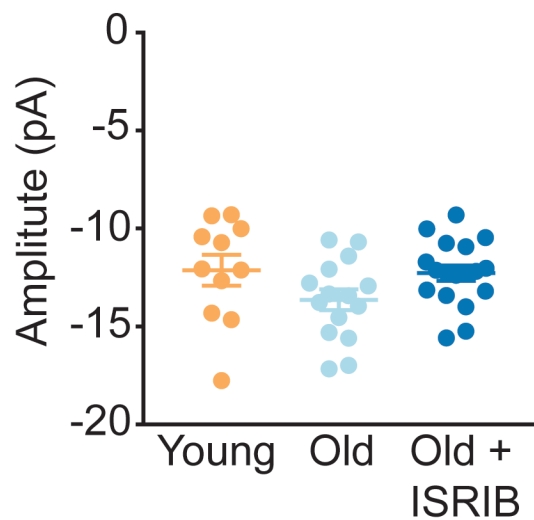

C

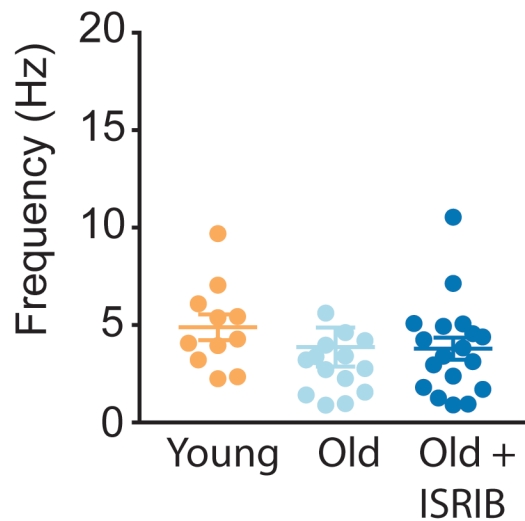

Supplement: supp [file elife-62048-supp-v1.zip]

A Young Old Old + ISRIB Figure 3 - Supplemental Figure 1

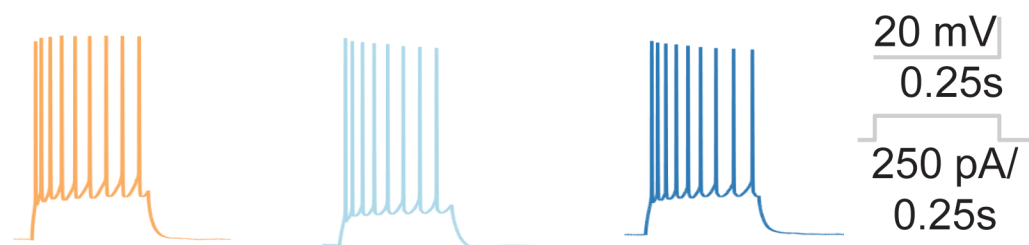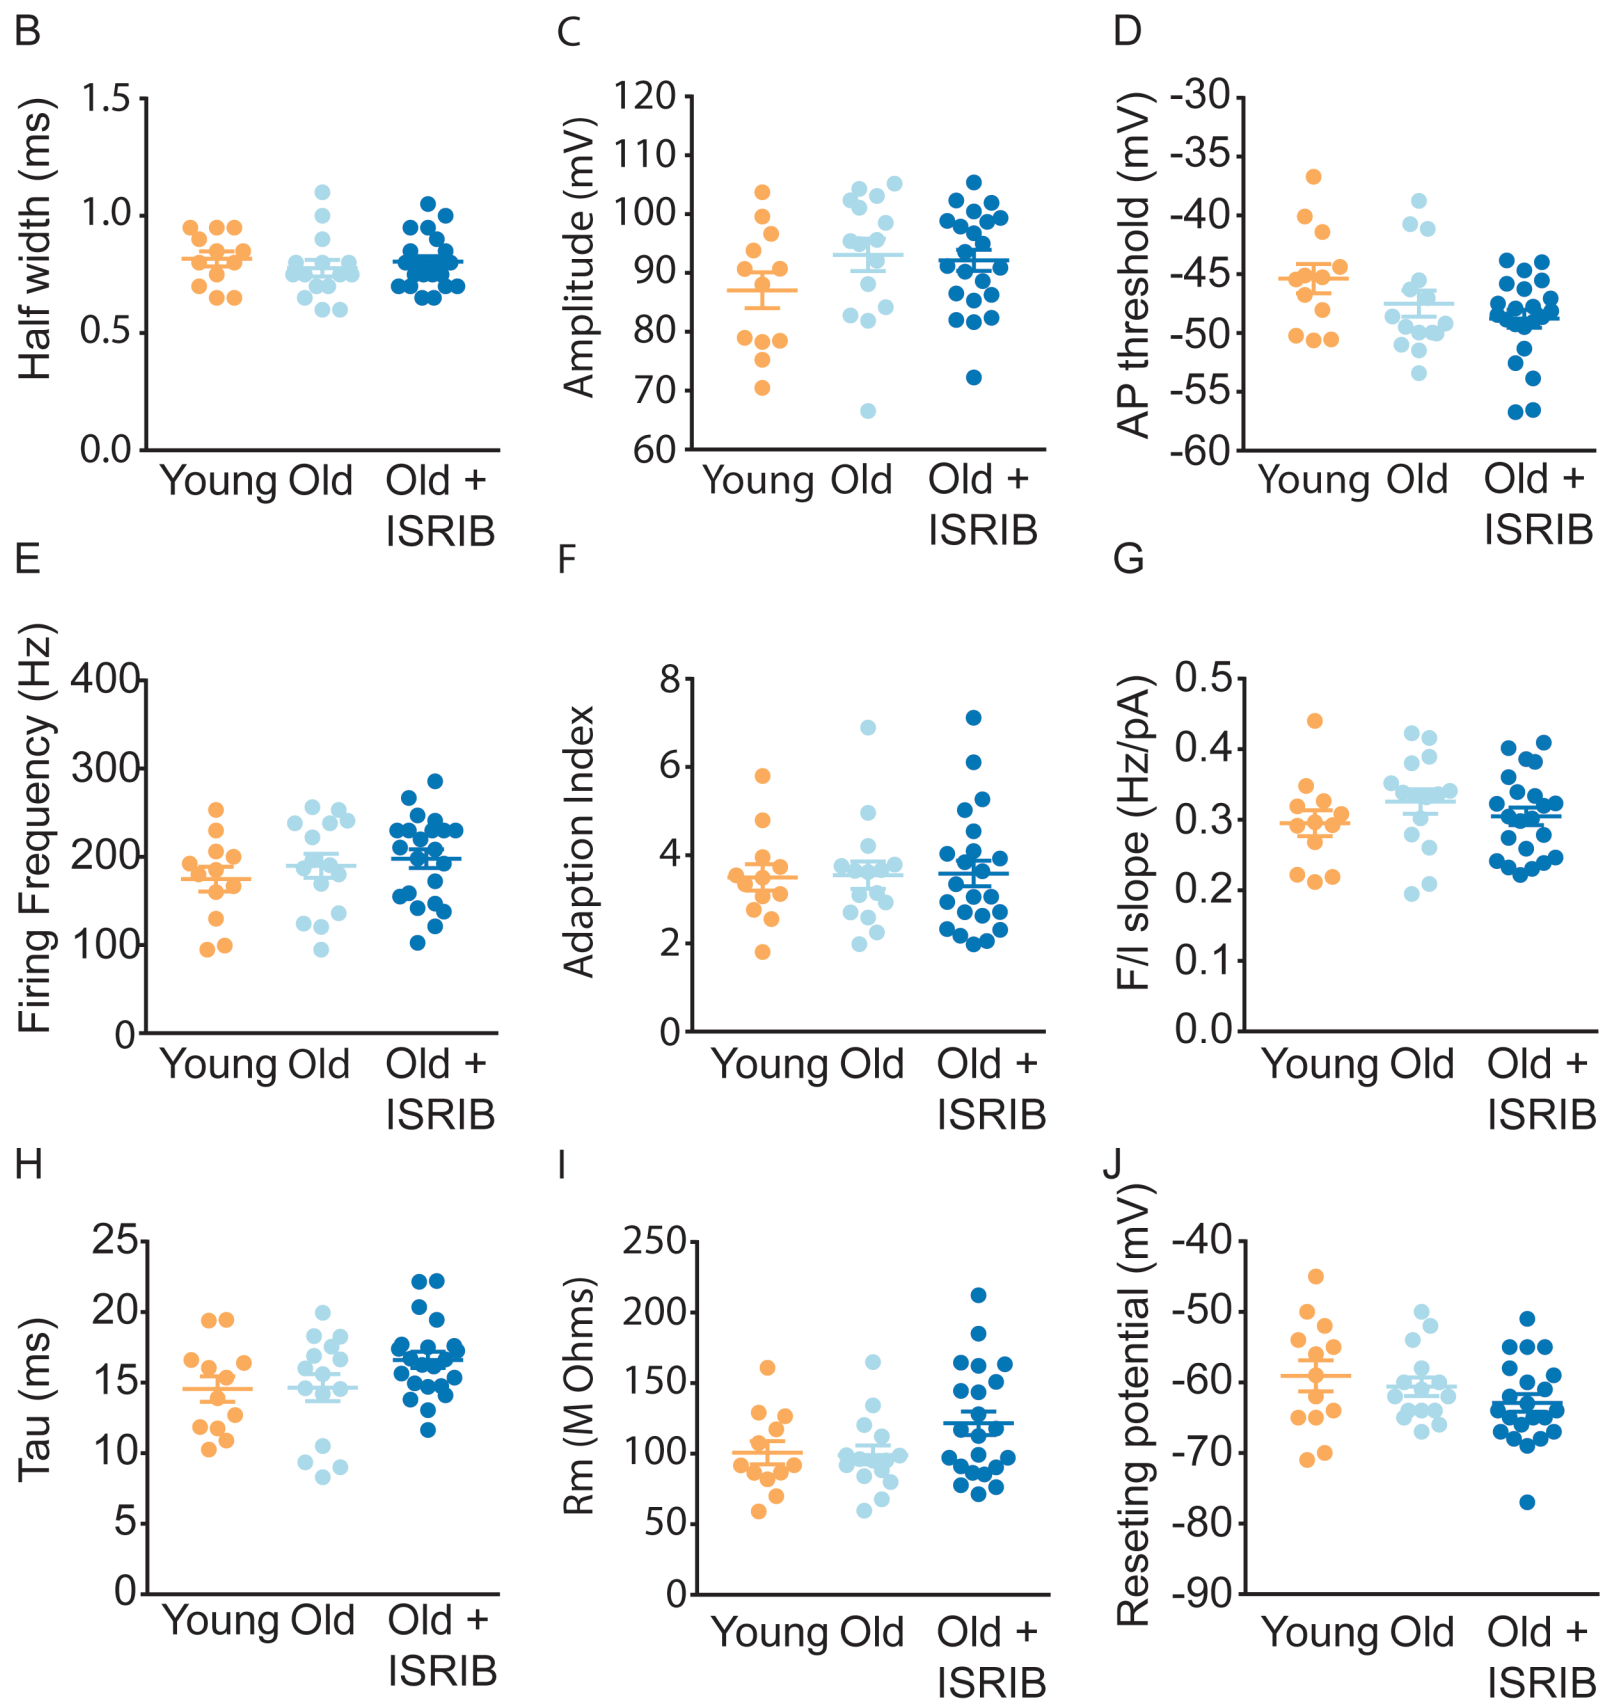

Supplement: supp [file elife-62048-supp-v1.zip]

Figure 2 - Supplemental Figure 1

A

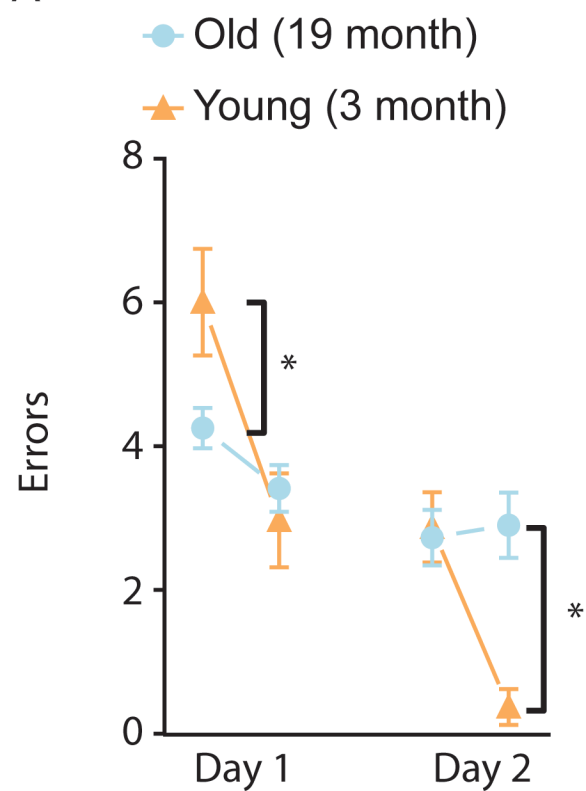

B

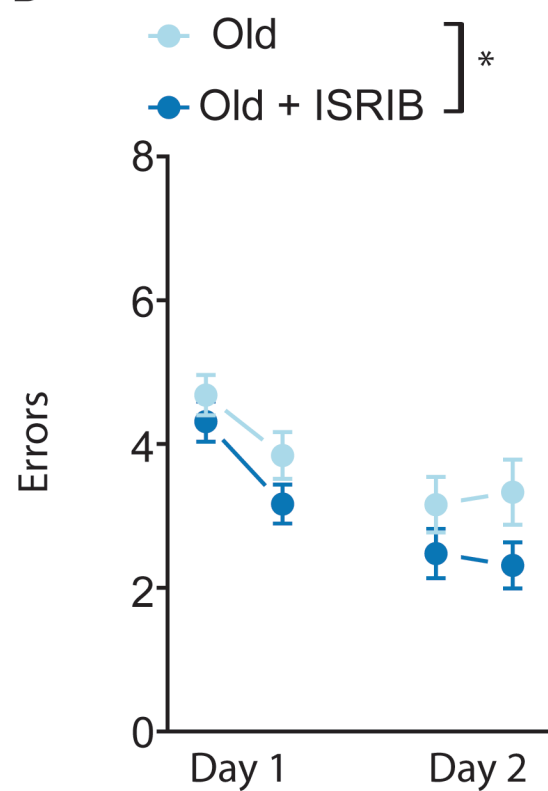

C

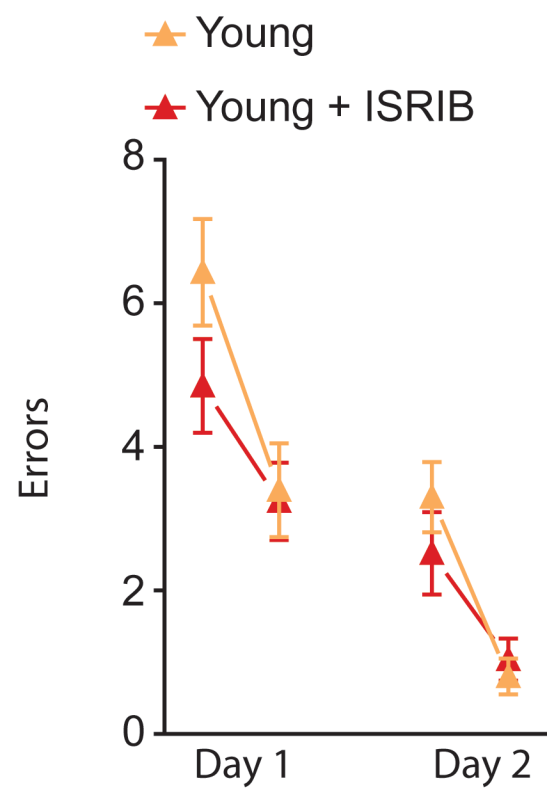

D

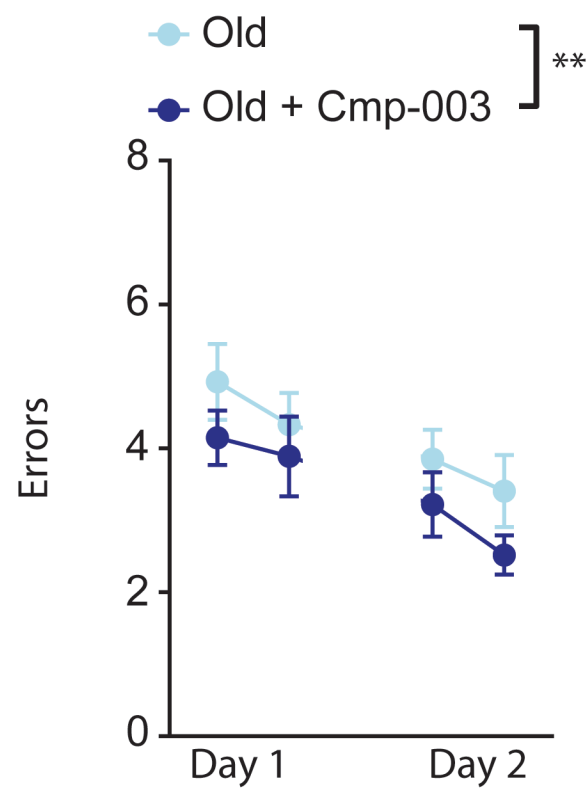

Supplement: supp [file elife-62048-supp-v1.zip]

Figure 5 - Supplemental Figure 1

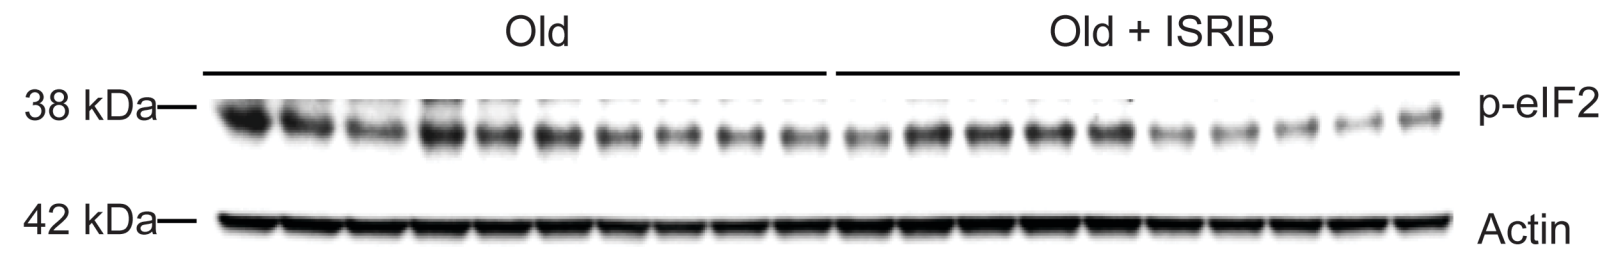

Supplement: supp [file elife-62048-supp-v1.zip]

Figure 1 - Supplemental Figure 2

A

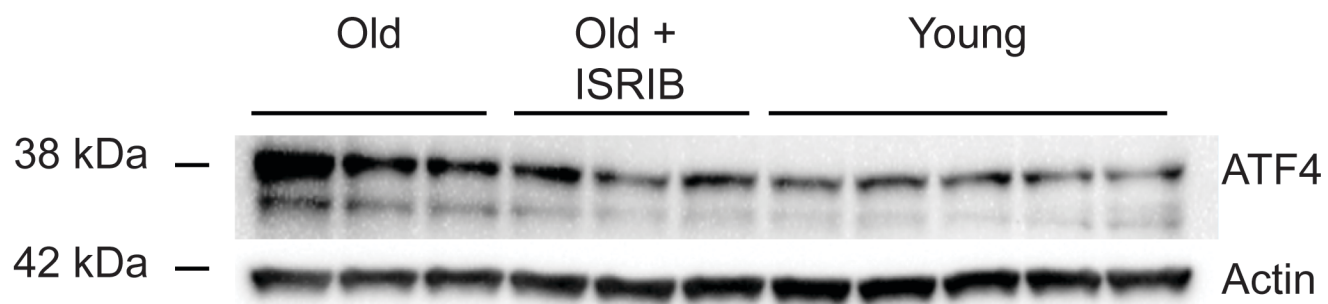

B

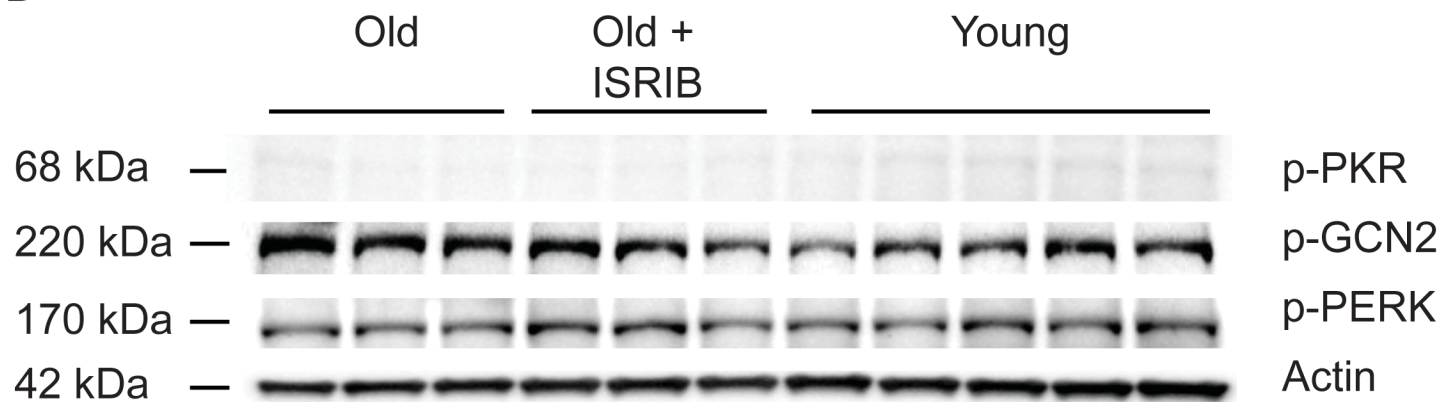

Supplement: supp [file elife-62048-supp-v1.zip]

Figure 4 - Supplemental Figure 1

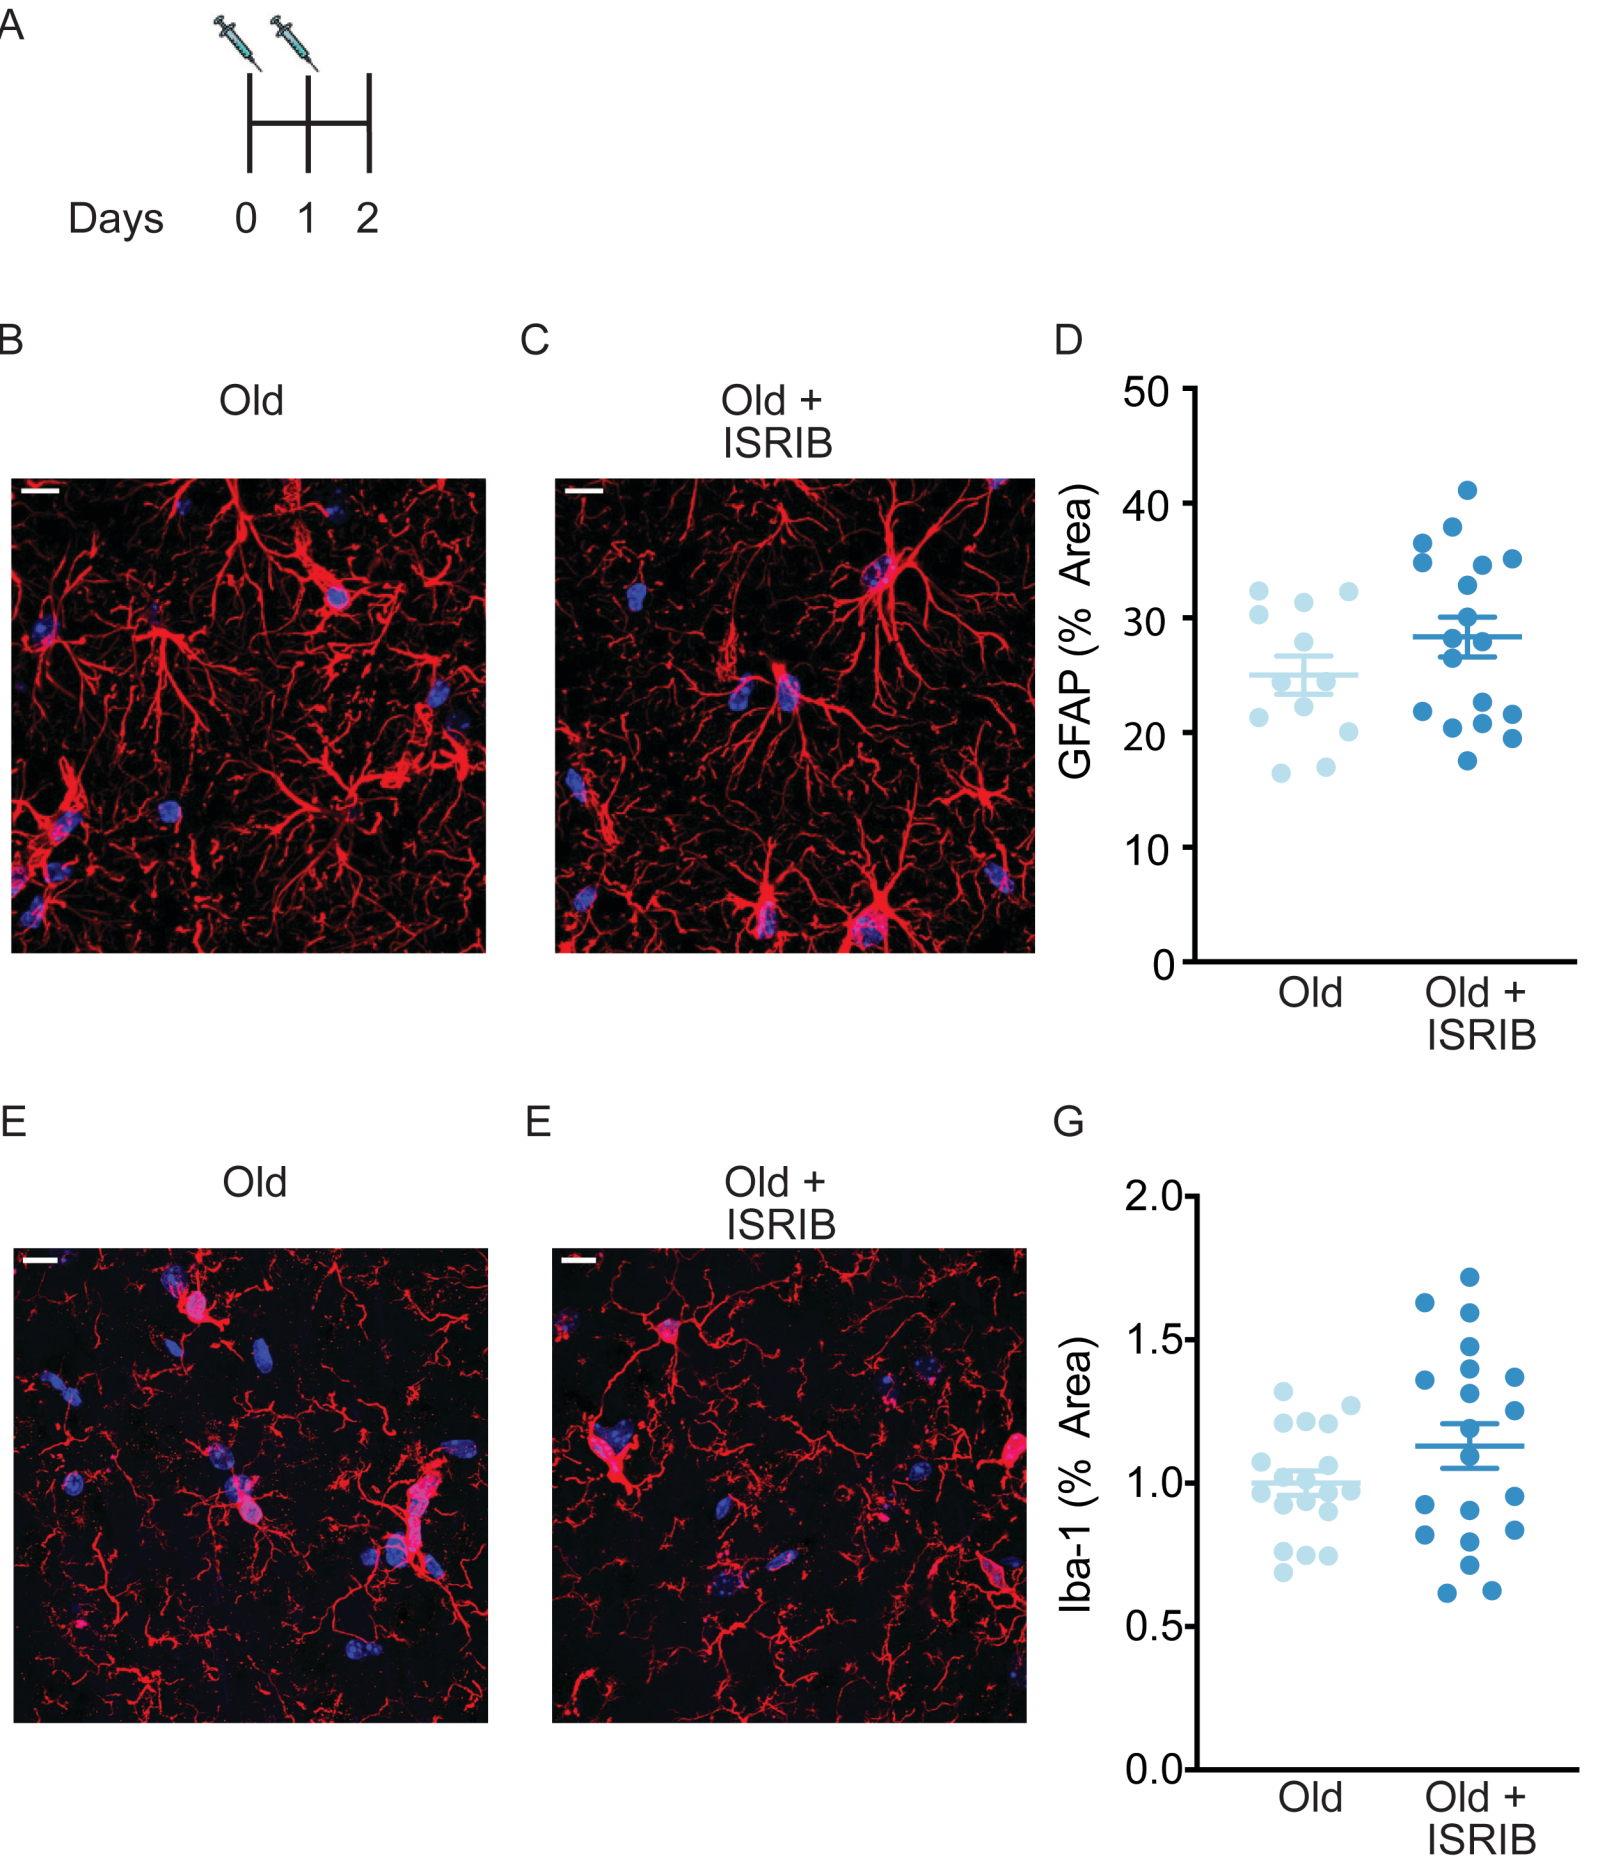

Supplement: supp [file elife-62048-supp-v1.zip]

Figure 1 - Supplemental Figure 1

A

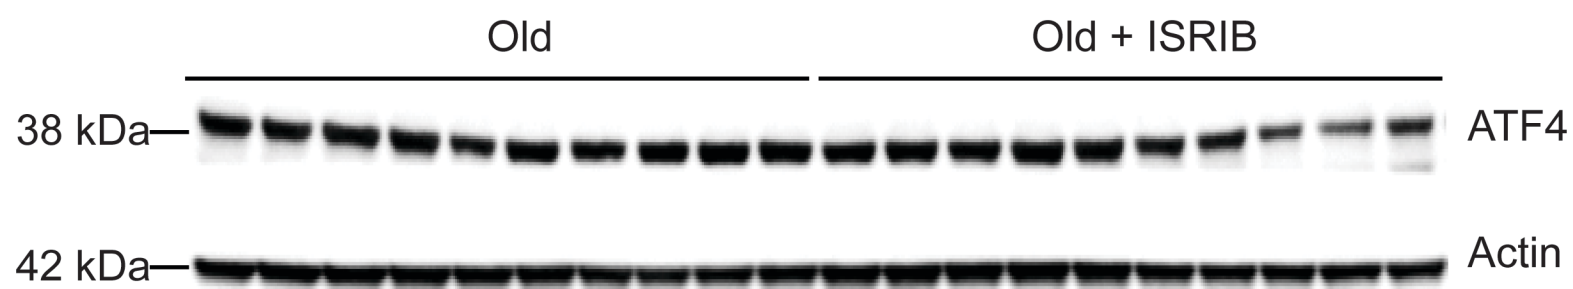

B

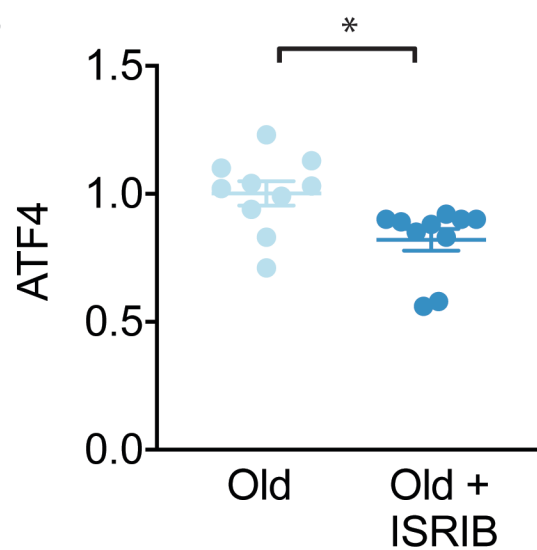

Supplement: supp [file elife-62048-supp-v1.zip]

Figure 2 - Supplemental Figure 2

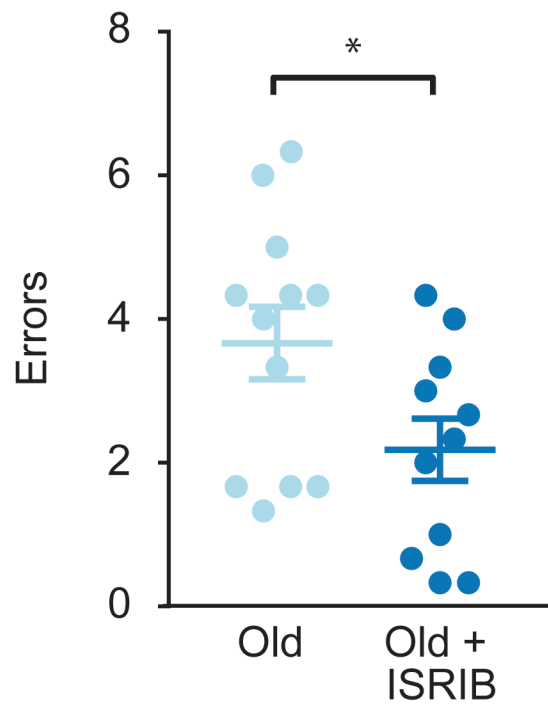

Supplement: supp [file elife-62048-supp-v1.zip]
